# Supplementary material for: How does hormone transition in transgender women change body composition, muscle strength and haemoglobin? Systematic review with a focus on the implications for sport participation
Source: HighWire-hosted journal article supplement (doi:10.1136/bjsports-2020-103106), 2021-03-01
Supplement: bjsports-2020-103106supp001_data_supplement.pdf [file bjsports-2020-103106supp001_data_supplement.pdf]

**Supplementary Table 1. Selection criteria and search terms using the PICOS framework.**

| PICOS        | Selection Criteria                                    | Search Term                                                                                                                                                                                                                                                                                          |
|--------------|-------------------------------------------------------|------------------------------------------------------------------------------------------------------------------------------------------------------------------------------------------------------------------------------------------------------------------------------------------------------|
| Population   | Hormone-naïve transfemales at Tanner stage 4 or later | #1 transgender OR transsexual OR trans people OR transwomen<br>#1A transgender OR transsexual OR transwomen                                                                                                                                                                                          |
| Intervention | Gender Affirming Hormone Therapy                      | #2 cross-sex hormone therapy OR hormonal treatment OR testosterone OR oestradiol<br>#2A hormone OR testosterone OR oestradiol<br>#2B hormone OR testosterone OR oestrogen<br>#2C hormone OR therapy OR testosterone OR oestrogen                                                                     |
| Comparison   |                                                       |                                                                                                                                                                                                                                                                                                      |
| Outcome      | Changes in LBM, CSA, strength, Hgb or HCT             | #3 grip strength OR muscle OR lean body mass OR haematocrit OR haemoglobin OR metabolic changes<br>#3A strength OR muscle OR lean OR haematocrit OR haemoglobin OR metabolic<br>#3B haematocrit OR haemoglobin OR muscle OR strength<br>#3C haematocrit OR haemoglobin OR muscle OR strength OR lean |
| Study design |                                                       |                                                                                                                                                                                                                                                                                                      |

Note: Pubmed searched as #1 AND #2 AND #3. Web of Science searched as #1 AND #2A AND #3A. Scopus searched as #1A AND #2B AND #3B. BioMed Central as #1A AND #2C AND #3C. The searches were limited to studies published in English.
